# Supplementary material for: An optimized intermolecular force field for hydrogen-bonded organic molecular crystals using atomic multipole electrostatics
Source: PubMed Central journal article supplement (PMC4971546; doi:10.1107/s2052520616007708), 2016-07-16
Supplement: b-72-00477-sup1.pdf [file b-72-00477-sup1.pdf]

## Supplementary Information for:

An optimized intermolecular force field for hydrogen bonded organic molecular crystals using atomic multipole electrostatics

Edward O. Pyzer-Knapp, Hugh P. G. Thompson and Graeme M. Day

### Contents:

1. Original W99 force field parameters
2. Revised parameters in eV
3. Chemical diagrams and Cambridge Structural Database reference codes for the parameterization set of crystal structures
4. Chemical diagrams and Cambridge Structural Database reference codes for the validation set of crystal structures
5. Sublimation enthalpy data used in parameterization and validation

### Original W99 force field parameters

Atom type definitions are:

|                                        |                                                           |
|----------------------------------------|-----------------------------------------------------------|
| H1: hydrogen in G-H group              | N1: nitrogen with triple bond                             |
| H2: hydrogen in alcoholic group        | N2: nitrogen with no bonded hydrogen (except triple bond) |
| H3: hydrogen in carboxyl group         | N3: nitrogen with one bonded hydrogen                     |
| H4: hydrogen in N-H group              | N4: nitrogen with two or more bonded hydrogens            |
| C4: carbon bonded to four other atoms  | O1: oxygen bonded to one other atom                       |
| C3: carbon bonded to three other atoms | O2: oxygen bonded to two other atoms                      |
| C2: carbon bonded to two other atoms   |                                                           |

Refer to equation (2) for functional form. All interactions between atoms of two different types are determined by the combining rules (equations 3-5). In the revised force fields W99rev631, W99rev6311, W99rev631P and W99rev6311P, all interactions between a hydrogen and the acceptor atom of a hydrogen bond are replaced by the parameters in Table 2.

In eV and Å

| Atom type | A (eV)  | B (Å <sup>-1</sup> ) | C (eV Å <sup>6</sup> ) |
|-----------|---------|----------------------|------------------------|
| H1        | 131.42  | 3.56                 | 2.885                  |
| H2        | 3.74    | 3.56                 | 0                      |
| H3        | 1.20    | 3.56                 | 0                      |
| H4        | 7.93    | 3.56                 | 0                      |
| C4        | 1363.64 | 3.60                 | 10.140                 |
| C3        | 2802.12 | 3.60                 | 17.637                 |
| C2        | 1069.96 | 3.60                 | 14.874                 |
| N1        | 998.59  | 3.48                 | 14.588                 |
| N2        | 1060.98 | 3.48                 | 14.491                 |
| N3        | 1989.27 | 3.48                 | 24.631                 |
| N4        | 4201.08 | 3.48                 | 58.349                 |
| O2        | 2949.92 | 3.96                 | 13.327                 |
| O1        | 2498.23 | 3.96                 | 13.067                 |

In kJ/mol and Å

| Atom type | A (eV) | B (Å <sup>-1</sup> ) | C (eV Å <sup>6</sup> ) |
|-----------|--------|----------------------|------------------------|
| H1        | 12680  | 3.56                 | 278.37                 |
| H2        | 361.3  | 3.56                 | 0                      |
| H3        | 115.7  | 3.56                 | 0                      |
| H4        | 764.9  | 3.56                 | 0                      |
| C4        | 131571 | 3.60                 | 978.36                 |
| C3        | 270363 | 3.60                 | 1701.73                |
| C2        | 103235 | 3.60                 | 1435.09                |
| N1        | 96349  | 3.48                 | 1407.57                |
| N2        | 102369 | 3.48                 | 1398.15                |
| N3        | 191935 | 3.48                 | 2376.55                |
| N4        | 405341 | 3.48                 | 5629.82                |
| O2        | 284623 | 3.96                 | 1285.87                |
| O1        | 241042 | 3.96                 | 1260.73                |

Re-optimised parameters, in eV (parameters in kJ/mol given in Table 2 of the main text).

| Acceptor atom  | W99   | W99rev631 | W99rev6311 | W99rev631P | W99rev6311P |
|----------------|-------|-----------|------------|------------|-------------|
| donor atom: H2 |       |           |            |            |             |
| O1             | 96.7  | 101       | 129        | 126        | 154         |
| O2             | 105.1 | 77        | 105        | 114        | 131         |
| N1             | 61.1  | 131       | 149        | 162        | 187         |
| N2             | 63    | 124       | 166        | 138        | 150         |
| N3             | 86.3  | 115       | 163        | 132        | 144         |
| N4             | 125.4 | 125.4     | 125.4      | 125.4      | 125.4       |
| donor atom: H3 |       |           |            |            |             |
| O1             | 54.7  | 58        | 127        | 104        | 138         |
| O2             | 59.5  | 89        | 133        | 116        | 129         |
| N1             | 34.6  | 102       | 70         | 133        | 92          |
| N2             | 35.7  | 118       | 118        | 142        | 186         |
| N3             | 48.8  | 48.8      | 48.8       | 48.8       | 48.8        |
| N4             | 71    | 71        | 71         | 71         | 71          |
| donor atom: H4 |       |           |            |            |             |
| O1             | 140.7 | 48        | 56         | 118        | 143         |
| O2             | 152.9 | 116       | 112        | 149        | 140         |
| N1             | 89    | 96        | 141        | 144        | 192         |
| N2             | 91.7  | 80        | 77         | 129        | 151         |
| N3             | 125.6 | 43        | 34         | 58         | 51          |
| N4             | 182.5 | 196       | 198        | 212        | 197         |

# Crystal structure (CSD) reference codes and molecular diagrams of the training set

H4...N1

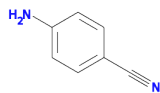

BERTOH01

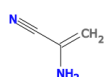

DESYOP

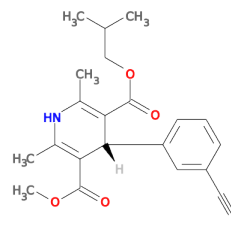

FULPIL

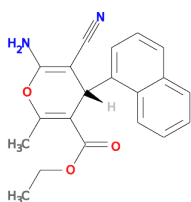

JIRSUZ

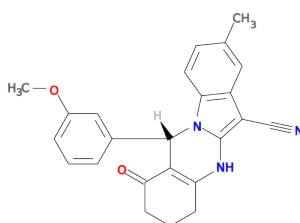

LACNAF

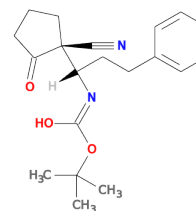

MOCQAX

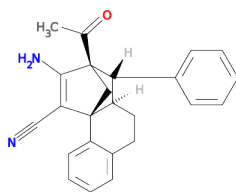

MUXXIN

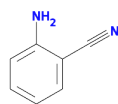

NAHQOC

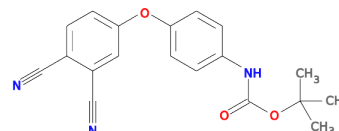

RAWCAV

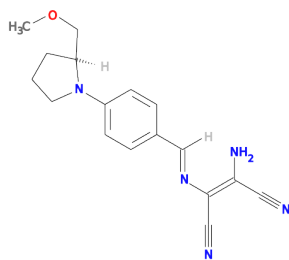

SEYSIZ

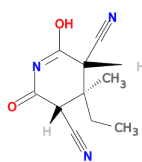

VINWOF

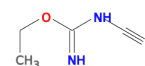

VODJEE

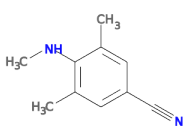

WERZUO04

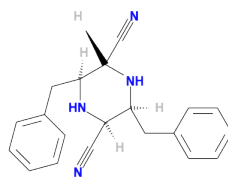

XERGAC

# H4...N2

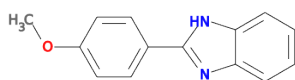

IDUGIY

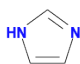

IMAZOL06

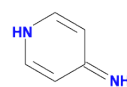

AMPYRE01

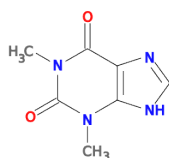

BAPLOT01

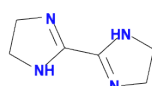

BEQWEZ

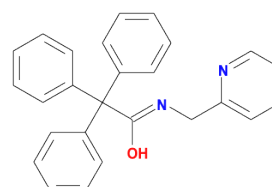

DELSUJ

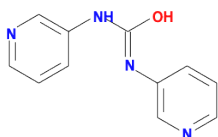

GASNEU

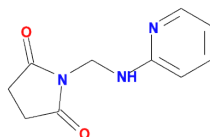

LALBAD

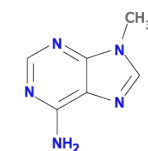

MEADEN02

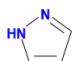

PYRZOL02

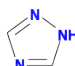

TRAZOL02

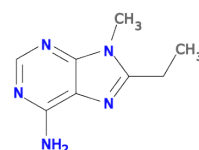

VAYJIO

# H4...N3

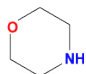

ATIZUG

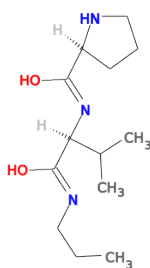

BACQON

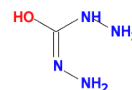

CBOHAZ02

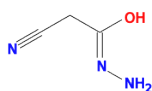

CYACHZ01

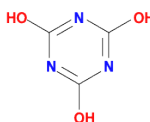

CYURAC12

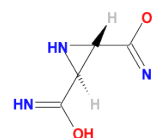

EREREY

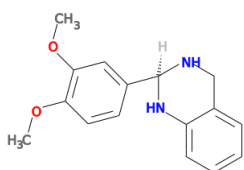

FOCYIG

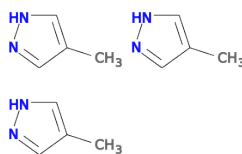

HOQHUQ

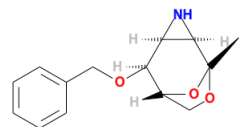

QOHBUL

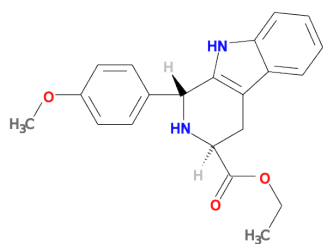

QUCPOU

## H4...N4

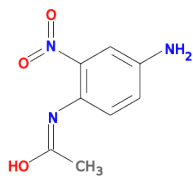

AVOJUR

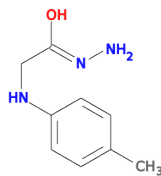

DUDGIT

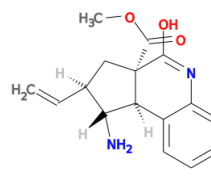

EZAZAH

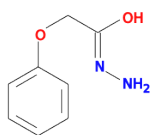

HUFDOC

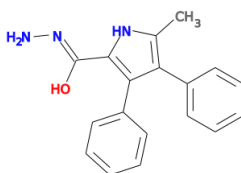

LECKUA

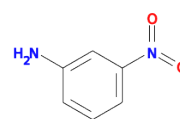

MNIANL02

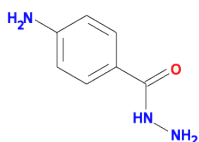

NUVXIM01

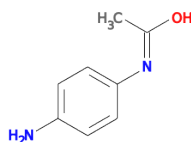

PACTAN01

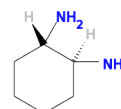

PIWXEY01

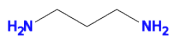

QATVUC

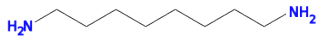

QATWUD

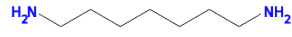

ROKZOG01

## H3...N1

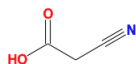

CYACAC01

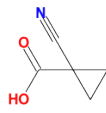

FOMWAF

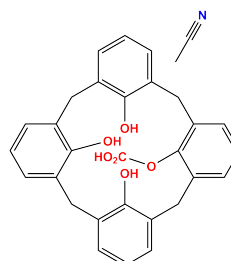

FOQMII

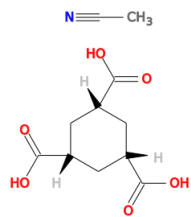

GUTRUI

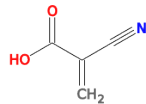

SUCSUE

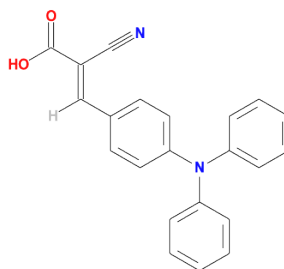

YUFRAT

### H3...N2

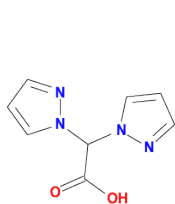

ABUBEE

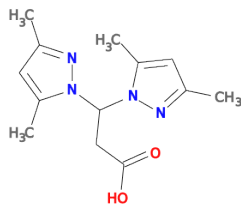

IGUWAJ

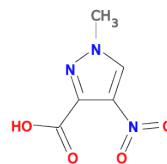

BOZGED

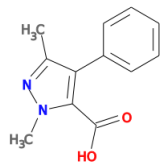

DIXMED

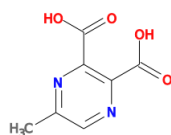

HERMOH01

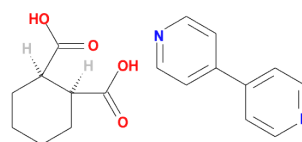

JAZBAO

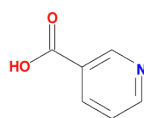

NICOAC02

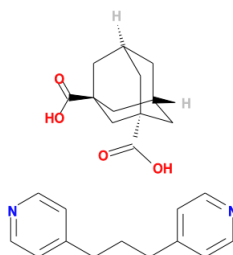

PANQOM

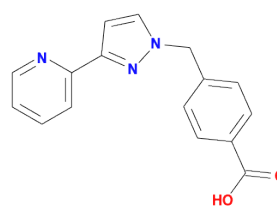

TIWBIL

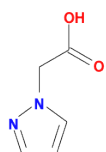

YAMFOI

# H3...O1

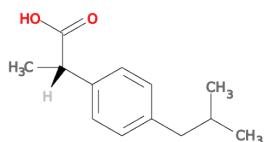

IBPRAC02

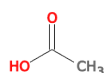

ACETAC03

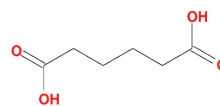

ADIPAC12

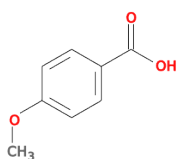

ANISIC03

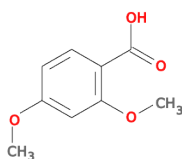

ISUQUI

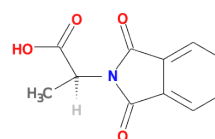

IZAMAX

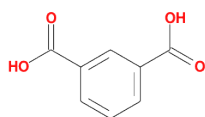

BENZDC01

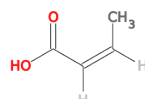

CROTAC

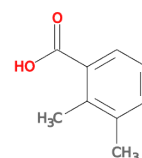

DMBZAC01

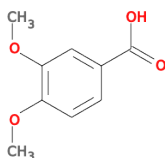

DMXBZA01

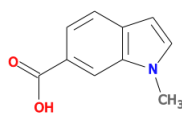

EPAGIM

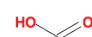

FORMAC02

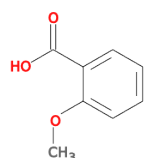

FUFBOX01

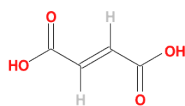

FUMAAC01

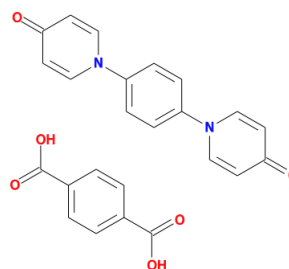

GEHTUJ

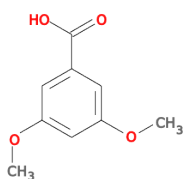

HEKMOZ

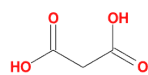

MALNAC09

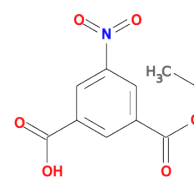

MOTCEE



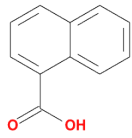

NAPOAC01

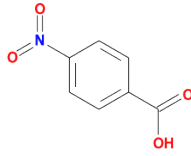

NBZOAC05

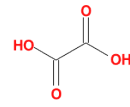

OXALAC04

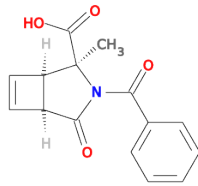

SACDIL

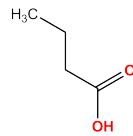

SUBRAC01

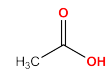

SUCACB03

### H3...O2

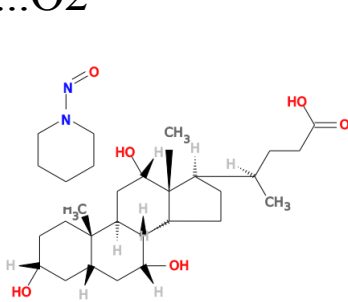

JOQHEC

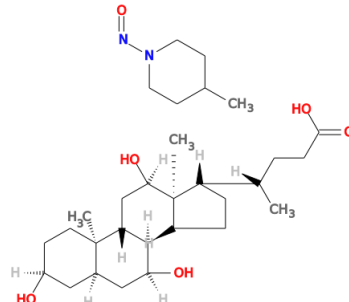

JOQHIG

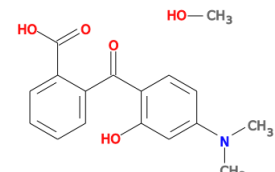

OGES EZ

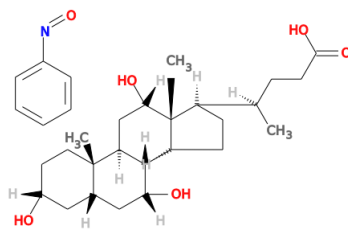

UMABAL

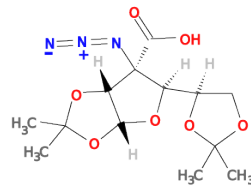

XAFMIB

## H2...N1

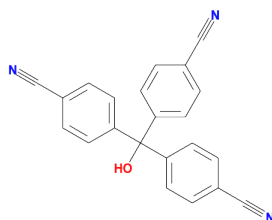

IDUDIU

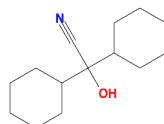

AFEVUD

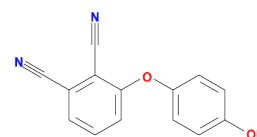

AHITOB

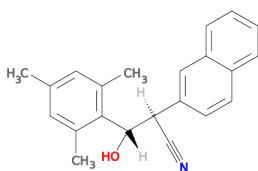

CEZNUR

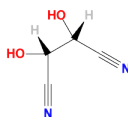

GOFQEY

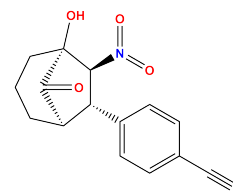

MUWRIG

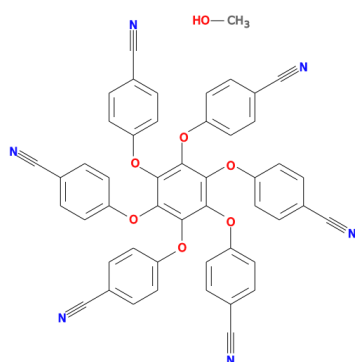

NOJZOC

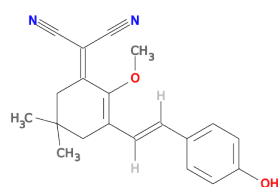

PAKBEK

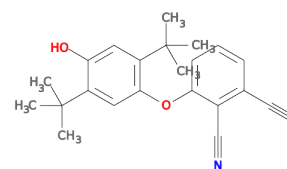

POYDOX

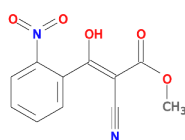

SEMYOZ

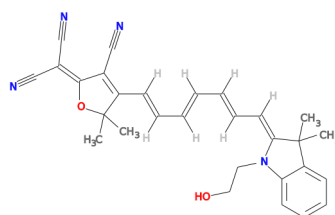

YAHGIZ

## H2...N2

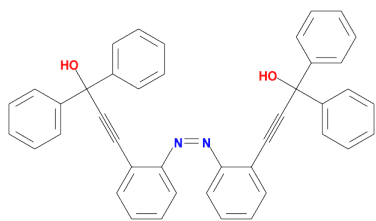

AWUGII

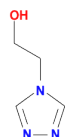

DAYMEW

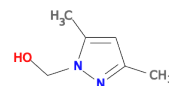

FIWFOH

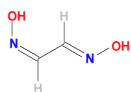

GLOXIM11

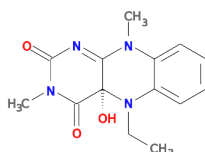

HAMSIZ

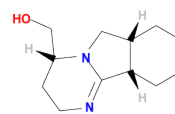

MATPEC

## H2...N3

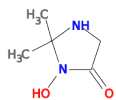

CALKOQ

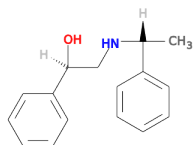

ENIYEF

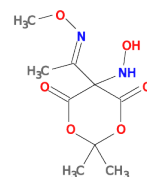

HANLEP

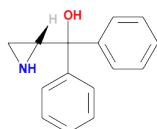

HOKCEP02

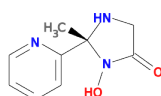

HUCZEL

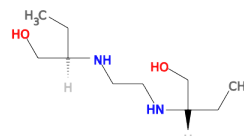

NERPOQ

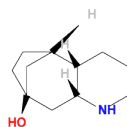

PETYOD

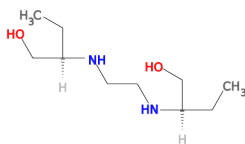

VIKMAE

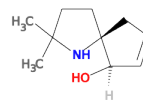

XOLPEU

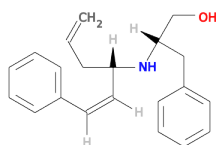

YAKXUE

## H2...O1

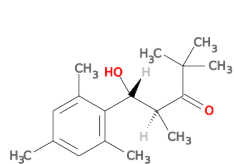

CEZPON

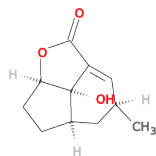

EBOVUN

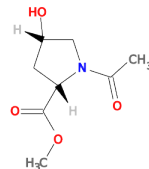

EMITEA

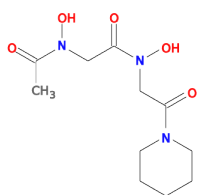

KAKYOM

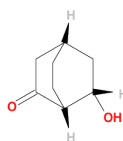

KEGHAG

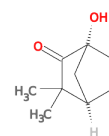

LUVCOU

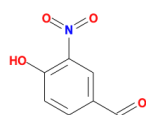

MIXXUN

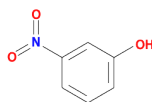

MNPHOL17

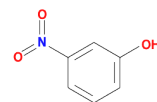

MNPHOL20

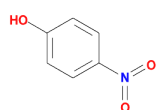

NITPOL03

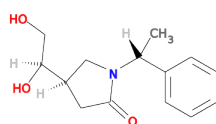

POFQEH

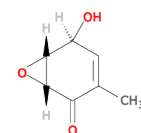

SEWHUY

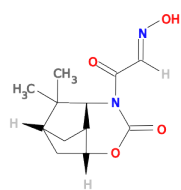

XAQTUF

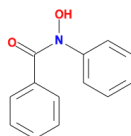

XETNOA

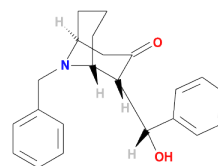

ZAPNIP

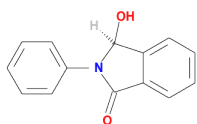

ZZZAWJ13

## H2...O2

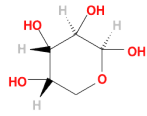

ABINOR04

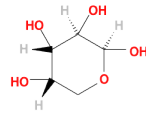

ABINOS02

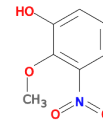

ADIPEJ

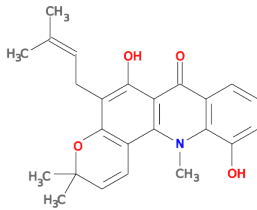

AFIHAZ

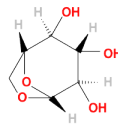

AHGLPY13

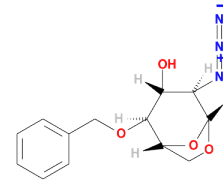

AHUZUZ

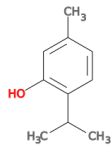

IPMEPL

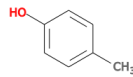

CRESOL01

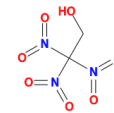

DIKXEB

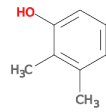

DIMPHE12

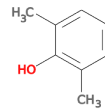

DMEPOL10

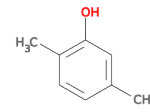

DMPHOL11

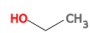

ETANOL

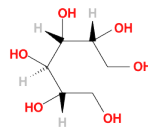

GLUCIT01

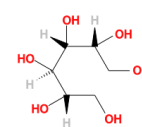

GLUCIT02

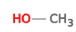

METHOL02

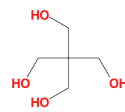

PERYTO10

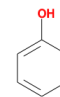

PHENOL03

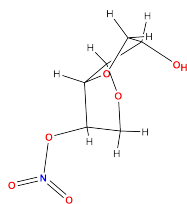

PIMKOO

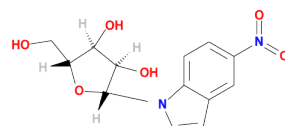

VIJFOK

## Validation set structures

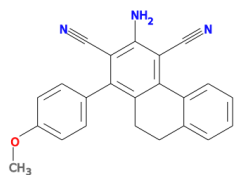

AZAJAN01

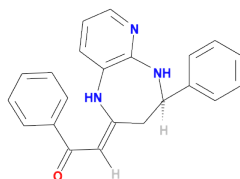

BAJYOB

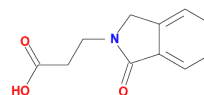

BIWWIO

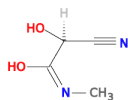

BOLZIL

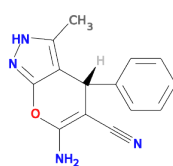

BOYZUL

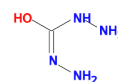

CBOHAZ01

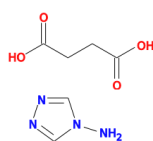

CIRXAD

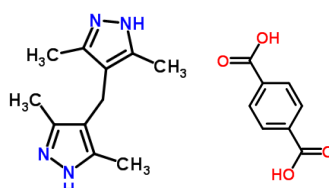

CUMRAE

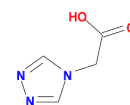

CUSDEA

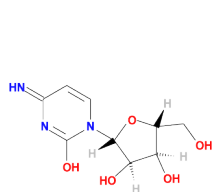

CYTIDI12

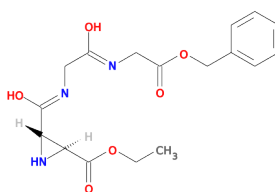

DAKCOI

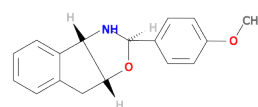

DEXSIJ

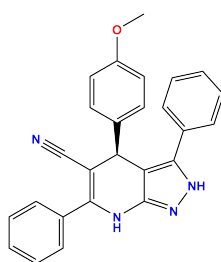

DEZQEE

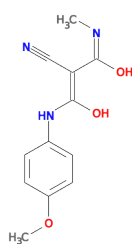

DIJGUZ

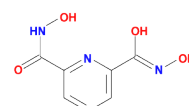

DOMQUS

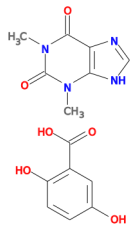

DUCROJ

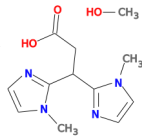

FINMEV

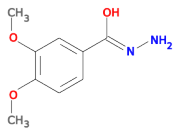

EDEVEP

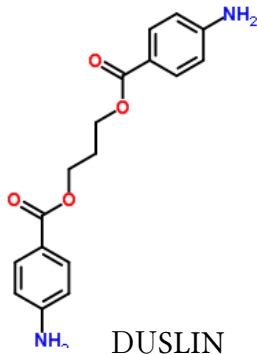

DUSLIN

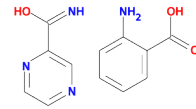

EBONUG

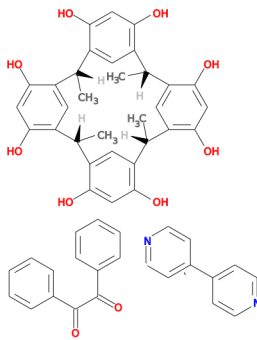

ENAZOI01

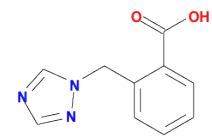

EPAGUY

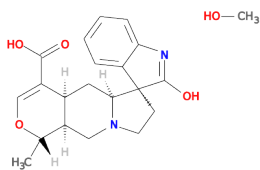

EROBUJ

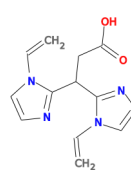

ETIXAH

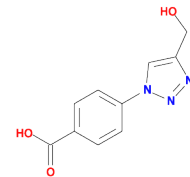

EVATUR

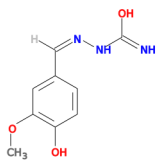

EVERED

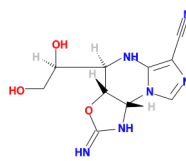

EWOSUZ

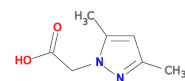

EWOWES

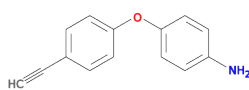

FANYAV

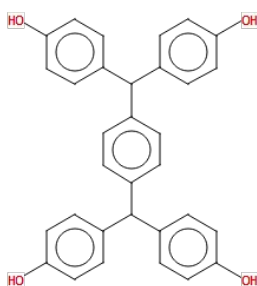

FAWXIL

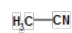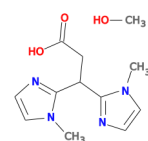

FINMEV

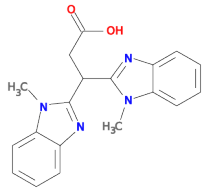

FINMIZ

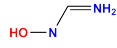

FORAMO01

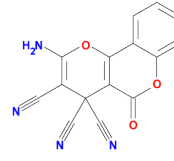

FOYBOL

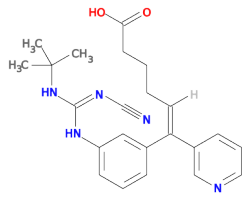

FUGQON01

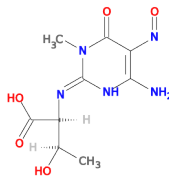

FUQLAE

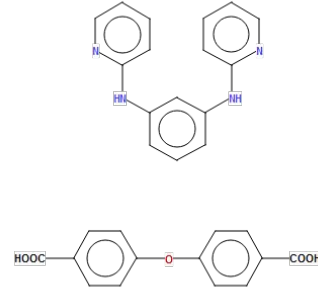

GABZAL

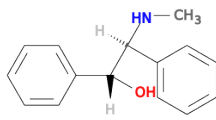

GAQXUT

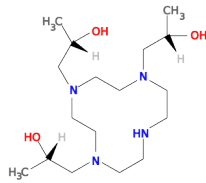

HESKUM

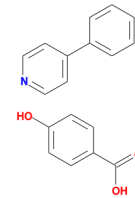

HONTAG

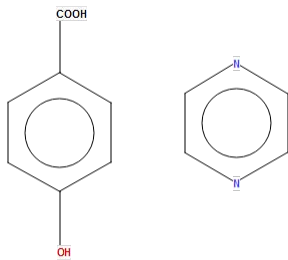

HONTEK

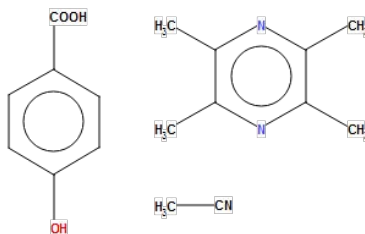

HONTIO

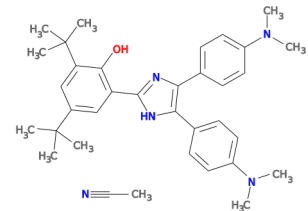

HORQOV



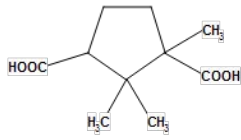

HUSWIB

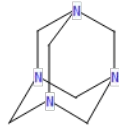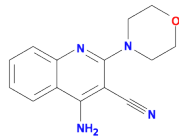

HUVBAB

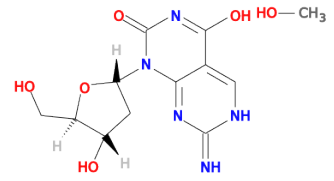

IZEYUI

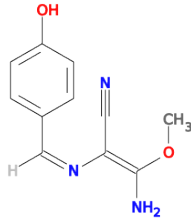

JIXBAT

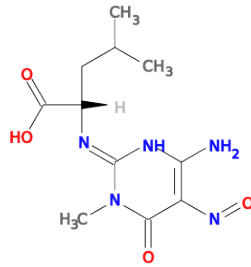

KASWUX

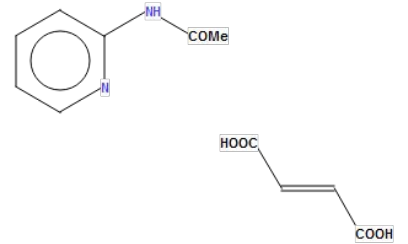

KEFBAZ

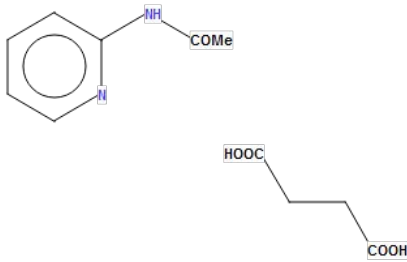

KEFBED

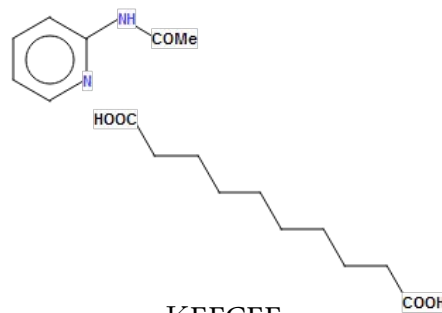

KEFCEE

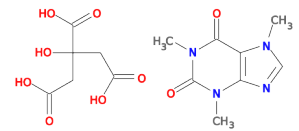

KIGKER

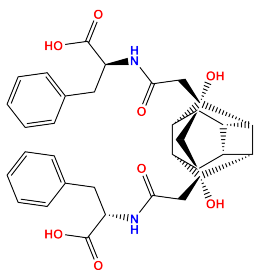

KUZJOF

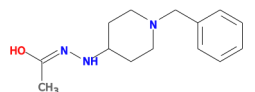

LAKYON

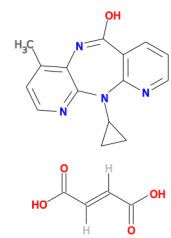

LATQII

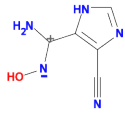

LOCTUT

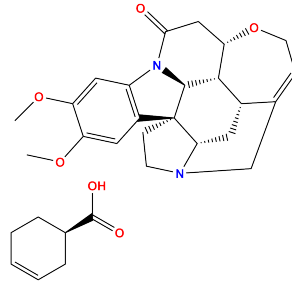

LOKRAE

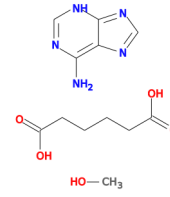

LOLCUL

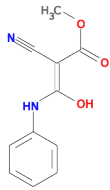

MEPTIK

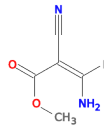

MIGWUV

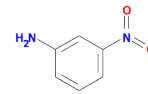

MNIANL03

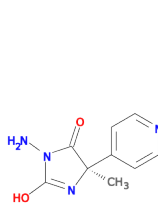

MOTFIL

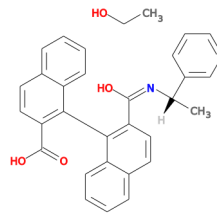

MOVRUL

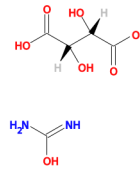

NEHPIZ01

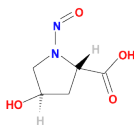

NERNII

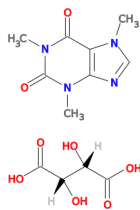

NEXWUJ

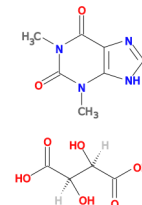

NEYCIE

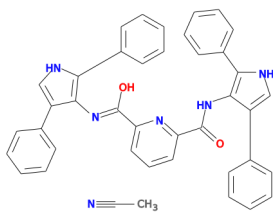

NIQDIB

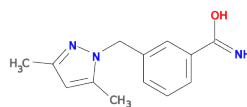

NIWVOG

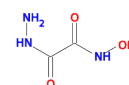

NUPTIC

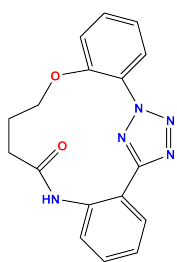

OKUZZEA

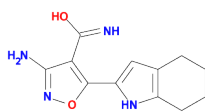

OMEKIB

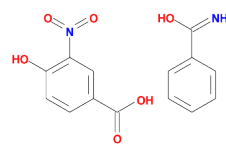

OVIBAX

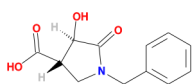

OXESIU

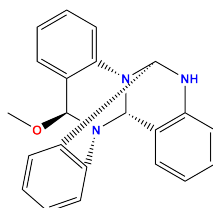

OYAKOP

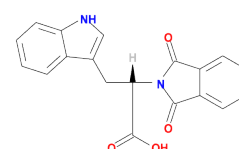

OZITAT

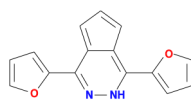

PAMBAH01

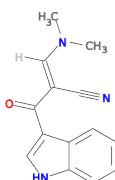

PODREG

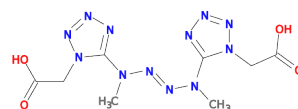

PORXUQ

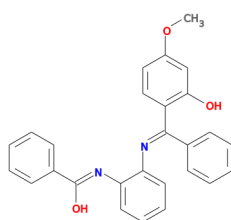

POSMIU

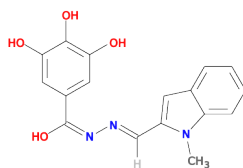

POWXEF

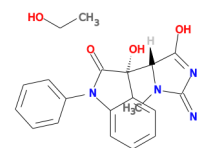

PUFGAZ

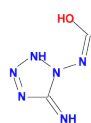

PUHJIM

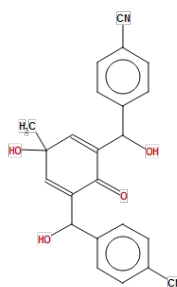

PUKZAX

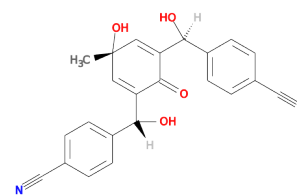

PUKZOL

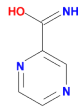

PYRZIN15

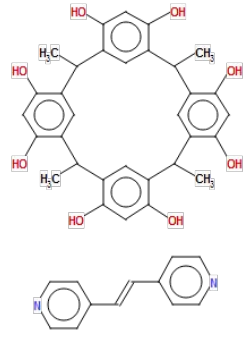

QQQDUV

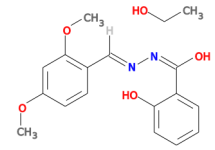

RIYRUN

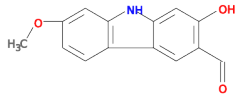

SABBII

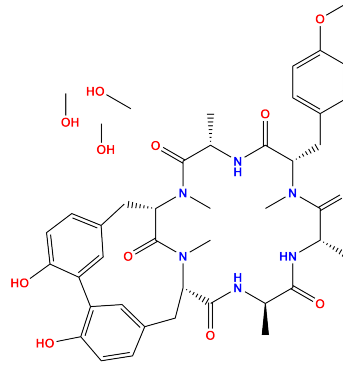

SAVLUY

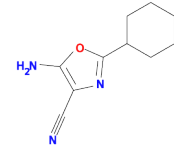

SAWPEN

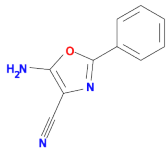

SAWPIR

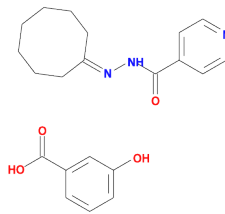

SAYNUD

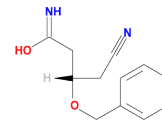

SEMWIR

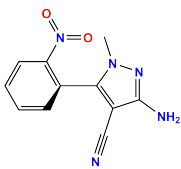

SEMZAM

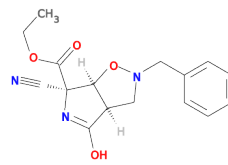

SOCBOC

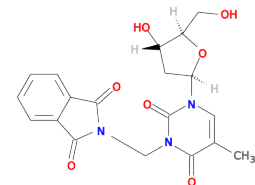

SOLLAH

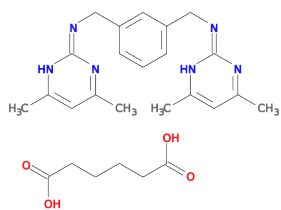

TACTAU

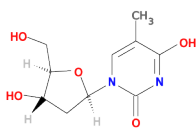

THYDIN04

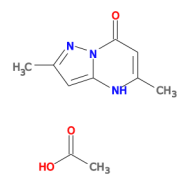

TUWYUG

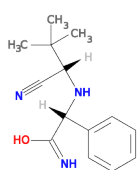

UBIMOH

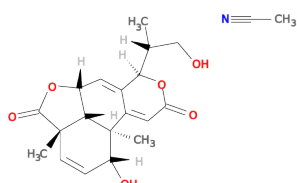

UHATAZ

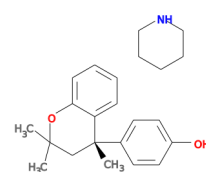

UHOXEV

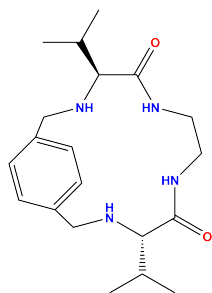

UHUSUL

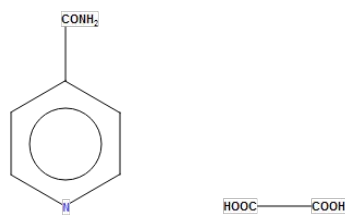

ULAWAF02

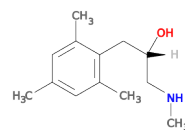

UNUBUB

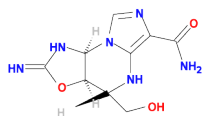

UPENOT

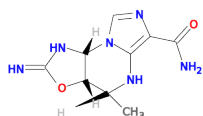

UPEPAH

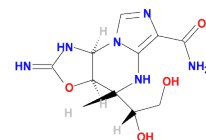

UPEPIP

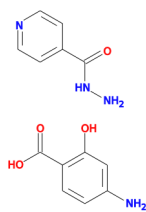

URUDER

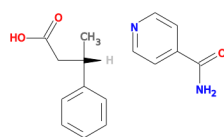

UYOSUX

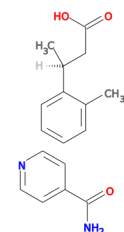

UYOTAE

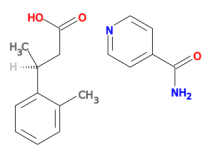

UYOTEI

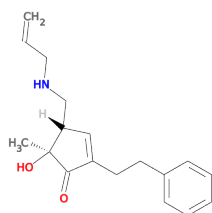

UZEVIF

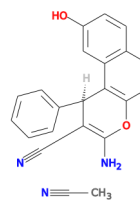

VALSOR

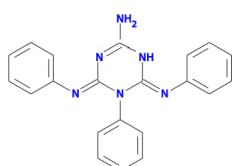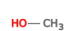

VARPUB

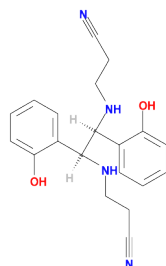

VAYXAV

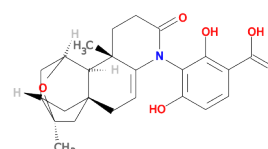

VIHTAI

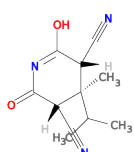

VINWUL

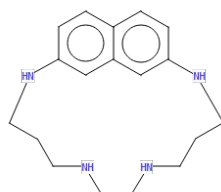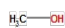

VONWEB

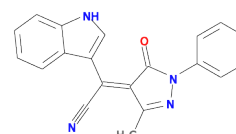

VUFJEL

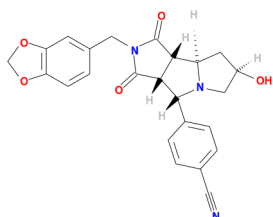

WAFBOV

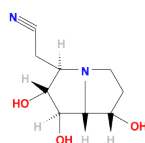

WEJVUC

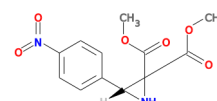

WIGJAY

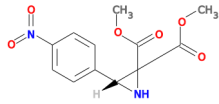

WIGJAY01

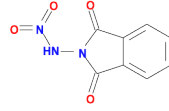

XAJSAE

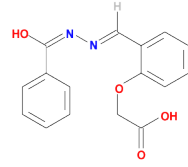

XEBWAE

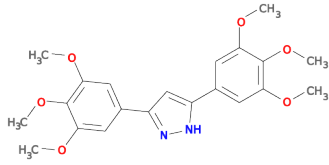

YESWUP

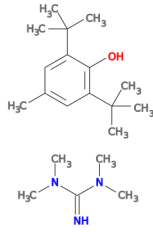

YUQYUF

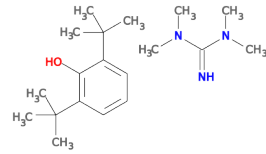

YUQYOZ

## Sublimation enthalpy data used in parameterization and validation

| compound                              | CSD reference code | $\Delta H_{\text{subl}}$ (kJ/mol) | T (K) | source           |
|---------------------------------------|--------------------|-----------------------------------|-------|------------------|
| acetanilide                           | ACANIL02           | 80.6                              | 313.5 | Chickos          |
| acetic acid                           | ACETAC03           | 67.95                             | 298   | Otero-de-la-Roza |
| adipic acid                           | ADIPAC12           | 133.6                             | 298   | Chickos          |
| 1,6-anhydro- $\beta$ -D-Glucopyranose | AHGLPY13           | 125.1                             | 365   | NIST             |
| imidazole                             | IMAZOL06           | 81.37                             | 298   | Otero-de-la-Roza |
| 3-aminopyridine                       | AMIPYR             | 80.7                              | 298   | NIST             |
| 4-aminopyridine                       | AMPYRE01           | 87.1                              | 298   | NIST             |
| p-methoxybenzoic acid                 | ANISIC03           | 111.6                             | 298   | NIST             |
| thymol                                | IPMEPL             | 95.73                             | 298   | NIST             |
| 2,4-dimethoxybenzoic acid             | ISUQUI             | 123.4                             | 298   | NIST             |
| theophylline                          | BAPLOT01           | 135                               | 298   | NIST             |
| isophthalic acid                      | BENZDC01           | 142                               | 298   | NIST             |
| benzamide                             | BZAMID02           | 102                               | 298   | NIST             |
| caprolactam                           | CAPLAC             | 89.8                              | 298   | NIST             |
| p-cresol                              | CRESOL01           | 73.1                              | 298   | NIST             |
| crotonic acid                         | CROTAC             | 72.2                              | 298   | NIST             |
| cianoacetamide                        | CYANAC             | 99.7                              | 336.5 | NIST             |
| cyanuric acid                         | CYURAC12           | 133                               | 298   | NIST             |
| 2,3-dimethylphenol                    | DIMPHE12           | 84                                | 298   | NIST             |
| 2,2-dimethylpropanamide               | DIXTAF             | 89                                | 298   | NIST             |
| 2,3-dimethylbenzoic acid              | DMBZAC01           | 104.6                             | 298   | NIST             |
| 2,6-dimethylphenol                    | DMEPOL10           | 75.6                              | 298   | NIST             |
| 2,6-dimethoxybenzoic acid             | DMOXBA01           | 121.7                             | 298   | NIST             |
| 2,5-dimethylphenol                    | DMPHOL11           | 84.6                              | 298   | NIST             |
| 3,4-dimethoxybenzoic acid             | DMXBZA01           | 129.8                             | 298   | NIST             |
| formic acid                           | FORMAC02           | 60.5                              | 274.5 | NIST             |
| formamide                             | FORMAM02           | 71.77                             | 298   | Otero-de-la-Roza |
| o-methoxybenzoic acid                 | FUFBOX01           | 110.7                             | 298   | NIST             |
| fumaric acid                          | FUMAAC01           | 123.6                             | 298   | NIST             |
| D-glucitol                            | GLUCIT01           | 186                               | 298   | NIST             |
| glutarimide                           | GLUTIM             | 94.1                              | 298   | NIST             |
| 3,5-dimethoxybenzoic acid             | HEKMOZ             | 127.1                             | 298   | NIST             |
| isobutyramide                         | IBURAM             | 86                                | 298   | NIST             |
| N-acetyl-L-                           | JEXNAB             | 133.1                             | 298   | NIST             |



|                       |          |       |       |                                           |
|-----------------------|----------|-------|-------|-------------------------------------------|
| valinamide            |          |       |       |                                           |
| maleic acid           | MALIAC12 | 105.4 | 318.5 | NIST                                      |
| malonic acid          | MALNAC09 | 111.4 | 298   | NIST                                      |
| 9-methyl-adenine      | MEADEN02 | 121.3 | 396   | NIST                                      |
| N-methyluracil        | METURA01 | 121.7 | 385.5 | NIST                                      |
|                       |          |       |       | NIST<br>Averaged value<br>(2 data points) |
| methylurea            | MEUREA   | 96.3  | 298   |                                           |
| m-nitroaniline        | MNIANL02 | 96.5  | 298   | NIST                                      |
|                       |          |       |       | NIST<br>Averaged value<br>(2 data points) |
| m-nitrophenol         | MNPHOL17 | 95.7  | 298   |                                           |
|                       |          |       |       | NIST<br>Averaged value<br>(8 data points) |
| 4-nitroaniline        | NANILI02 | 101   | 298   |                                           |
|                       |          |       |       | NIST<br>Averaged value<br>(2 data points) |
| 1-naphthoic acid      | NAPOAC01 | 112   | 298   |                                           |
| 4-nitrobenzoic acid   | NBZOAC05 | 119.7 | 298   | NIST                                      |
|                       |          |       |       | NIST<br>Averaged value<br>(3 data points) |
| nicotinic acid        | NICOAC02 | 117.5 | 298   |                                           |
| 4-nitrophenol         | NITPOL03 | 92.4  | 298   | NIST                                      |
| oxalic acid           | OXALAC04 | 93.63 | 298   | NIST                                      |
| oxalic acid           | OXALAC06 | 93.7  | 298   | NIST                                      |
| pentaerythritol       | PERYTO10 | 163   | 298   | NIST                                      |
| phenol                | PHENOL03 | 65.3  | 280.5 | NIST                                      |
| 2-pyridone            | PYRIDO04 | 86.6  | 298   | NIST                                      |
|                       |          |       |       | NIST<br>Averaged value<br>(7 data points) |
| pyrazole              | PYRZOL02 | 70    | 298   |                                           |
| suberic acid          | SUBRAC01 | 147.8 | 298   | NIST                                      |
| succinic acid         | SUCACB03 | 123.1 | 298   | NIST                                      |
| terephthalic acid     | TEPHTH03 | 146.6 | 298   | NIST                                      |
| 2,4,6-trinitroaniline | TNIOAN   | 125.3 | 298   | NIST                                      |
|                       |          |       |       | NIST<br>Averaged value<br>(6 data points) |
| 1,2,4-triazole        | TRAZOL02 | 83    | 298   |                                           |
| urea                  | UREAXX12 | 93.79 | 298   | Otero-de-la-Roza                          |
| 1,1-dimethylurea      | WIFKEB01 | 93.5  | 298   | NIST                                      |

NIST = NIST chemistry webbook, <http://webbook.nist.gov/chemistry/>

Chikos = J. S. Chikos and W. E. Acree, *Journal of Physical and Chemical Reference Data*, 2002, 31, 537-698

Otero-de-la-Roza = A. Otero-eRoza and E. R. Johnson, *the journal of chemical physics*, 2012, 137, 054103
